# Supplementary material for: Context specificity of the EMT transcriptional response
Source: PubMed Central journal article supplement (PMC7195456; doi:10.1038/s41467-020-16066-2), 2020-05-01
Supplement: 41467_2020_16066_MOESM1_ESM.pdf [file 41467_2020_16066_MOESM1_ESM.pdf]

## **Supplementary Information**

### **Context specificity of the EMT transcriptional response**

Cook & Vanderhyden

## Supplementary Figures

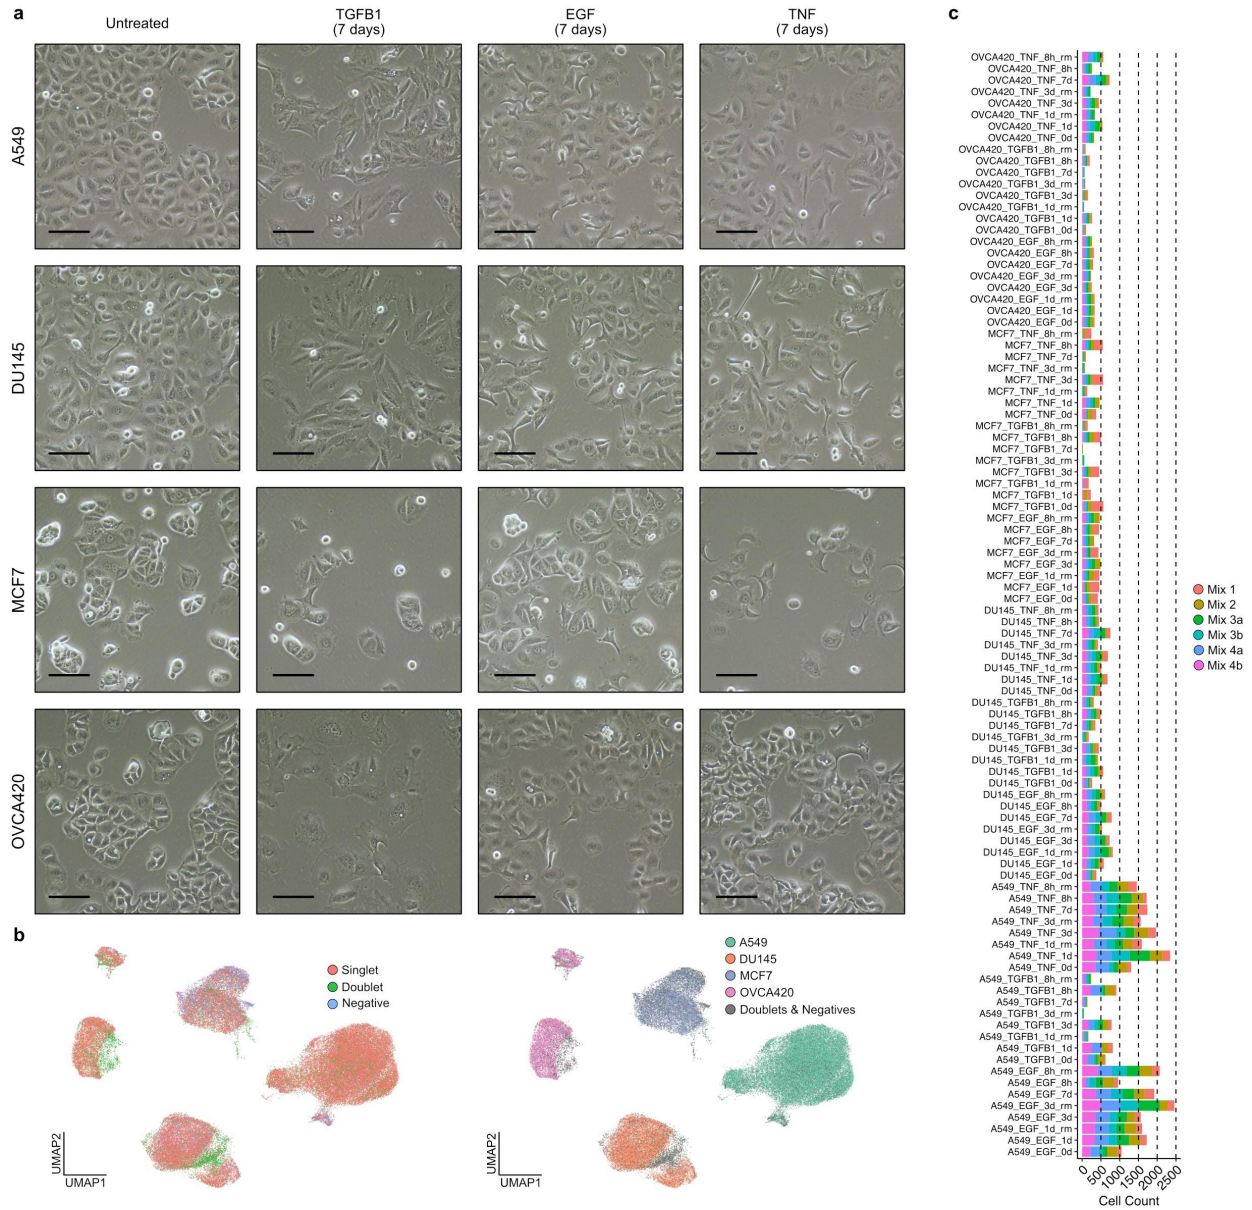

**Supplementary Figure 1. Experimental conditions are associated with EMT-associated morphological changes.** **a**, Phase contrast images (20x) of A549, DU145, MCF7, and OVCA420 cells treated with TGFB1, EGF, or TNF. Displayed images are representative fields of all replicates. Scale bar = 100 $\mu$ m. **b**, UMAP embeddings of scRNA-seq data from multiplexed EMT time course experiments. Cells are coloured by their annotation after demultiplexing. **c**, Cell counts for each of the 96 samples of the time course experiments after demultiplexing.

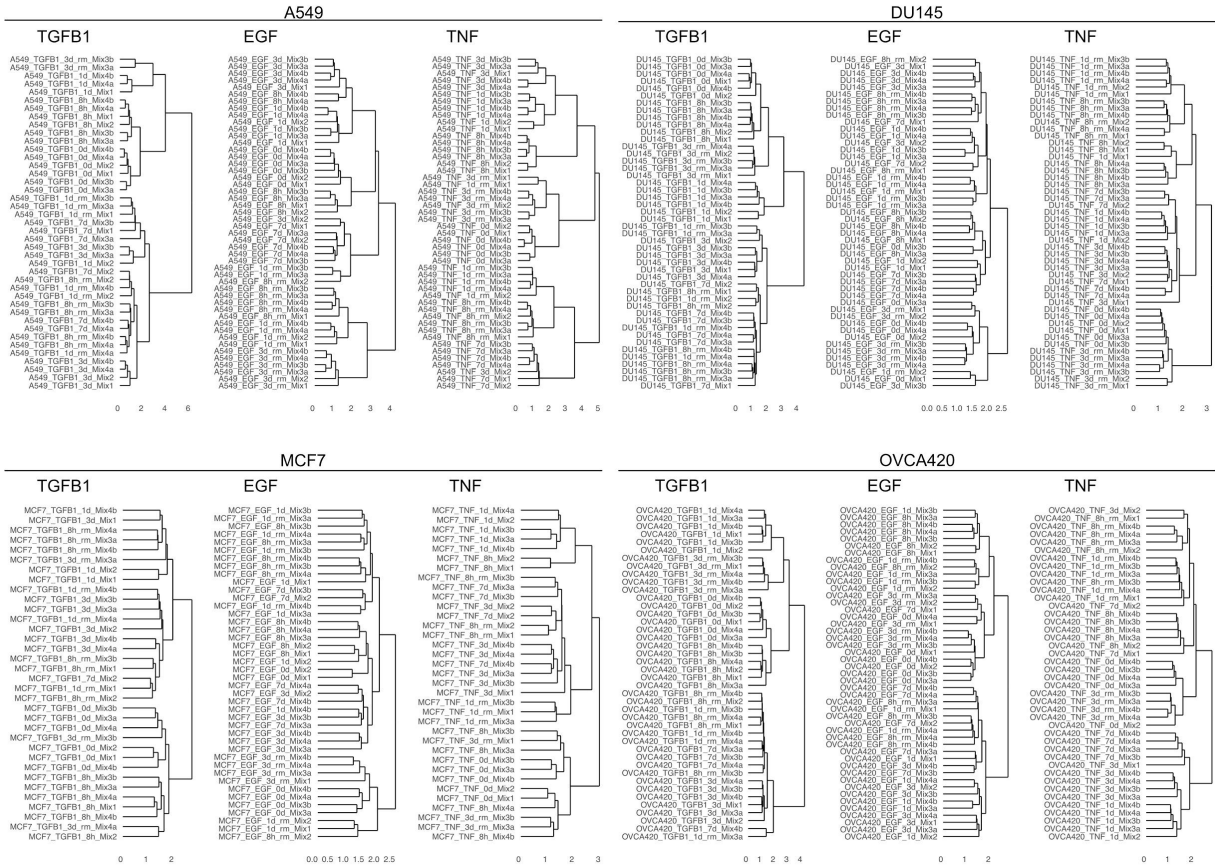

**Supplementary Figure 2. Reproducibility of experimental conditions across replicates.**

Hierarchical clustering of pairwise correlations (Spearman) from scaled expression values of the top 2000 variable genes of each dataset. Scaled expression data includes a simple linear batch correction.

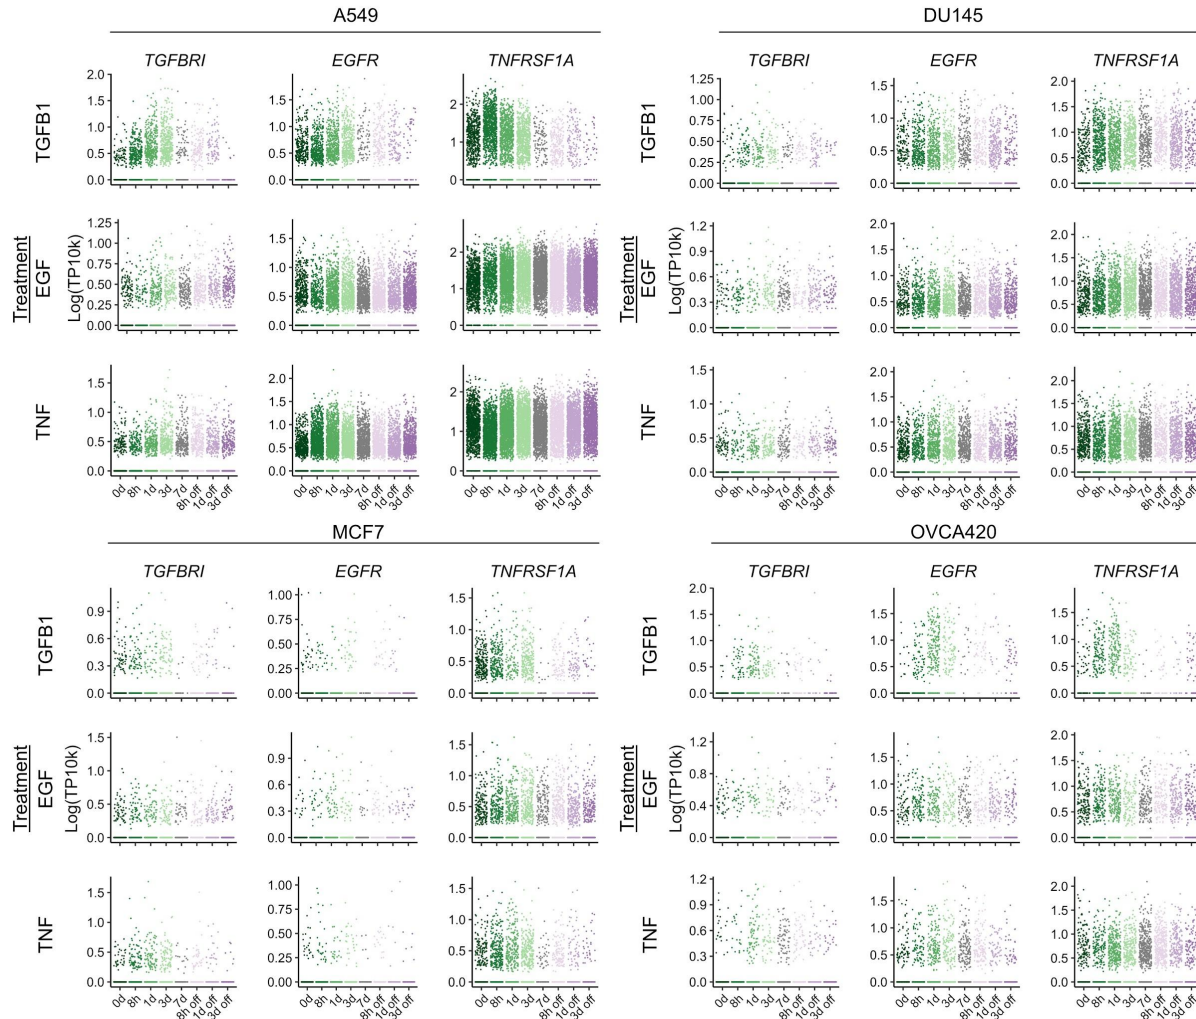

**Supplementary Figure 3. Receptors for EMT ligands are expressed in each cell line.** Plots showing the expression levels of *TGFBR1*, *EGFR*, and *TNFRSF1A* in each time course experiment. Expression values are log-transformed counts per 10k molecules (TP10k). Each point corresponds to a single cell.

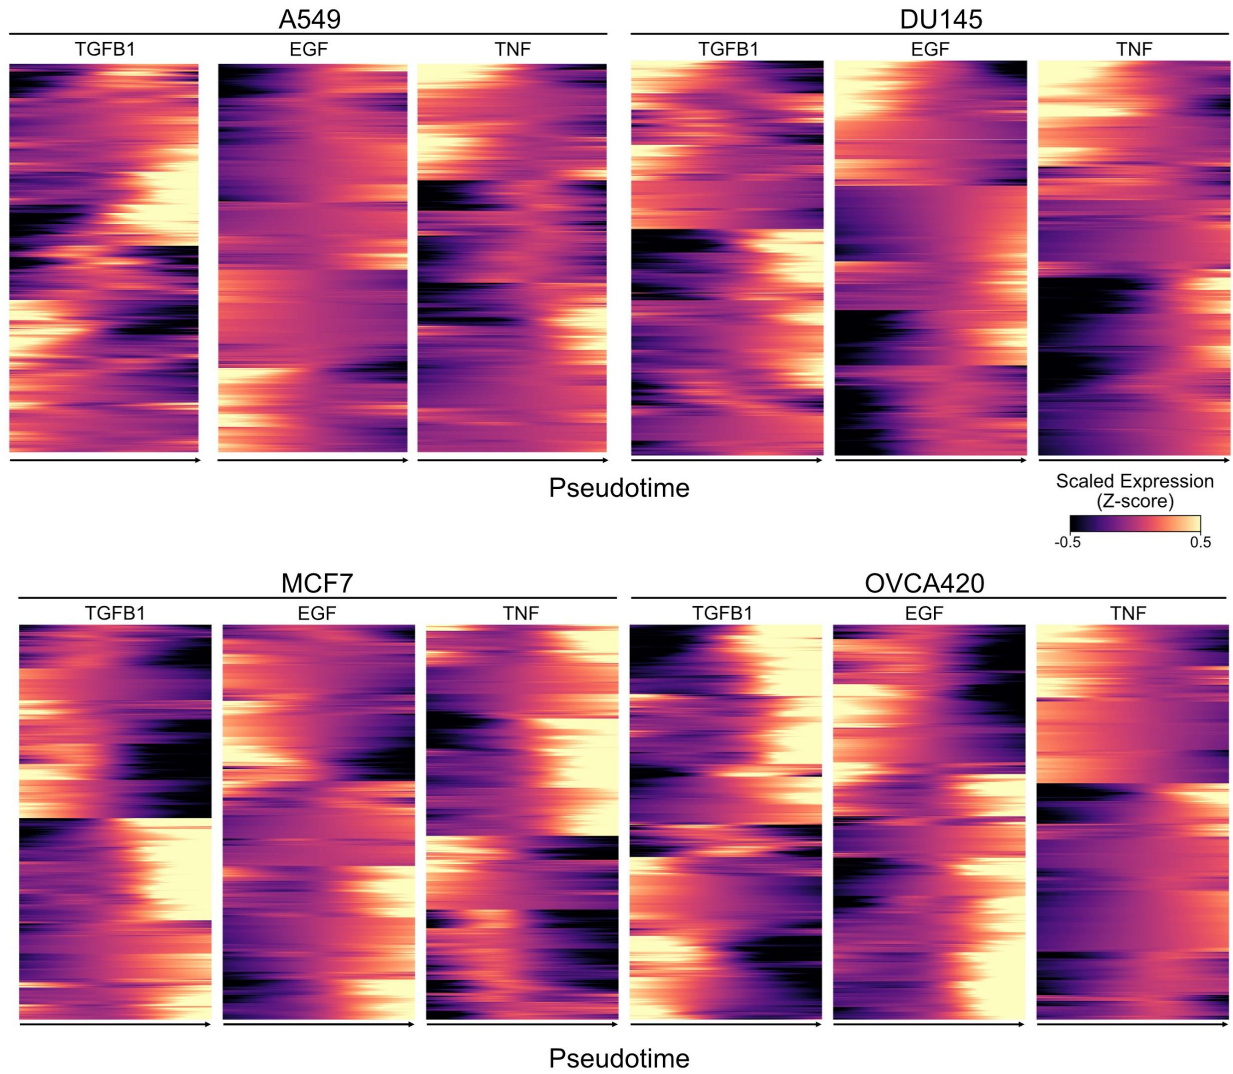

**Supplementary Figure 4. The EMT involves multiple waves of transcriptional events.**

Heatmaps showing expression dynamics of genes differentially expressed in each time course experiment over pseudotime. The x-axis of the heatmaps correspond to EMT progression (pseudotime).

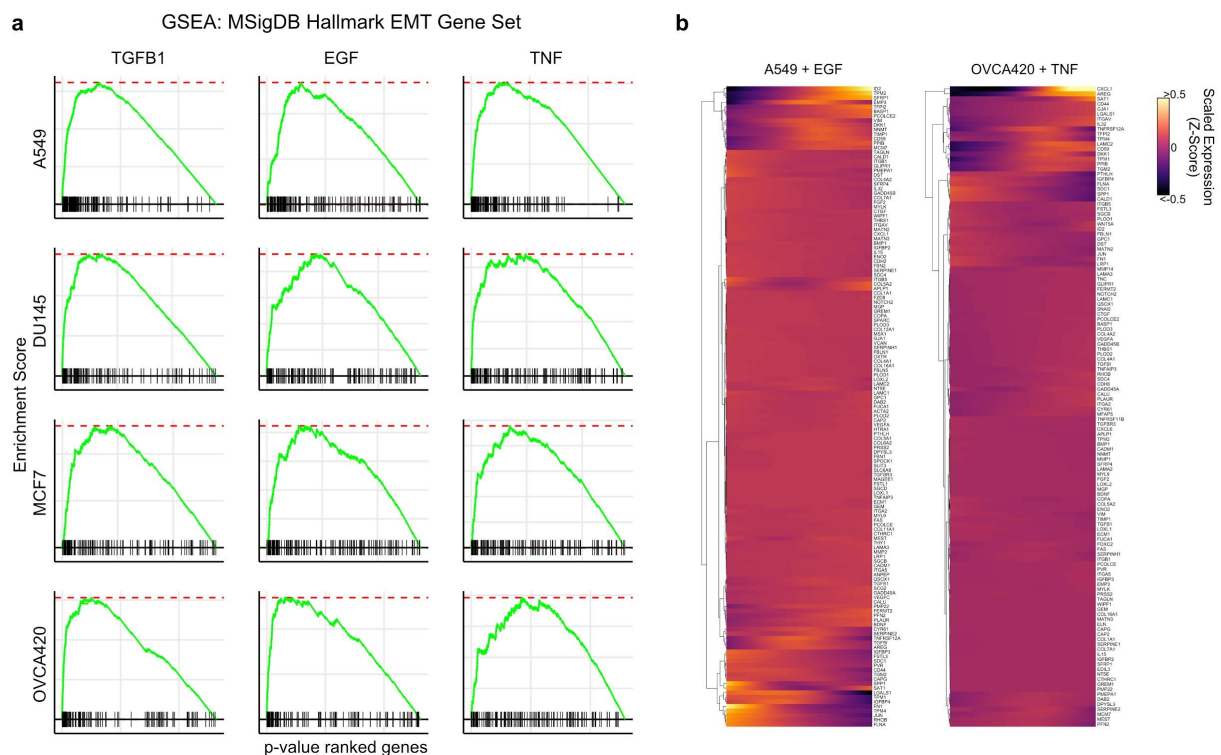

**Supplementary Figure 5. EMT-associated variability is present in all conditions. a**, GSEA plots showing the enrichment of the MSigDB EMT hallmark gene set in the most differentially expressed genes for each time course. **b**, Expression dynamics of the MSigDB EMT hallmark gene set throughout pseudotime in A549 cells treated with EGF (left) and OVCA420 cells treated with TNF (right).



**a**

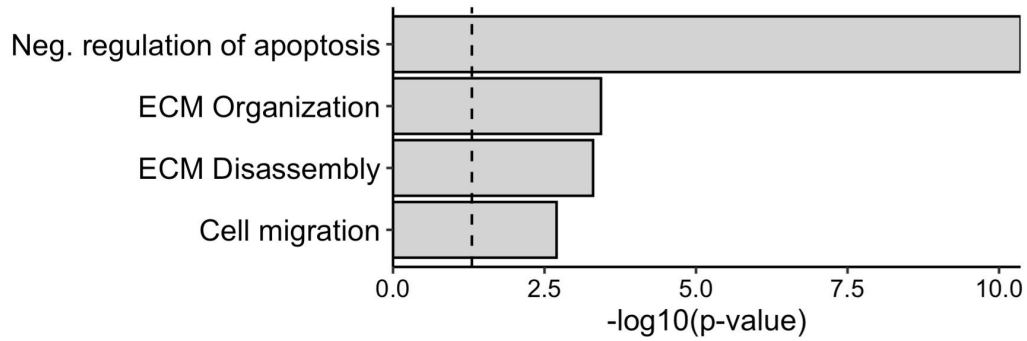

**b**

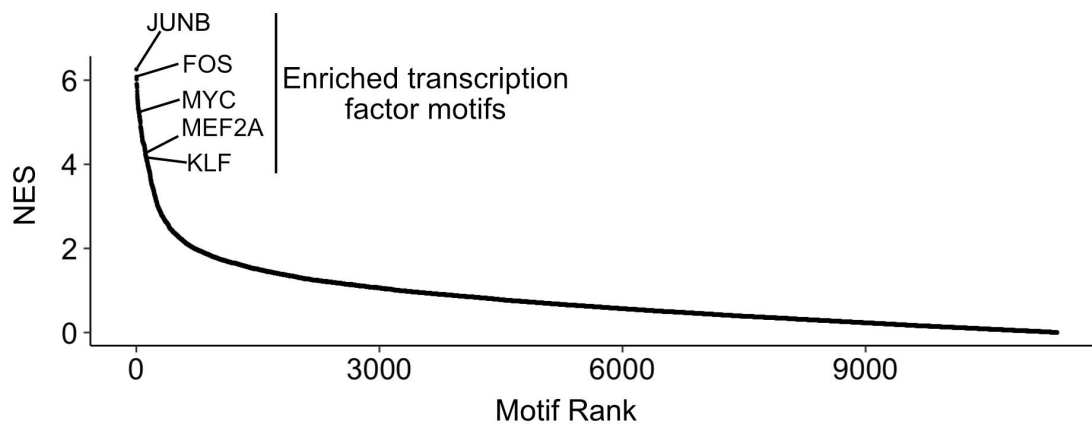

**Supplementary Figure 7. Characteristics of conserved EMT genes.** **a**, Select GO Terms associated with the 86 genes commonly upregulated during the EMT. The dashed vertical line corresponds to  $p=0.05$ . P-values were calculated from a Fisher's exact test with a Benjamini-Hochberg false discovery rate correction for multiple comparisons. **b**, Normalized enrichment scores (NES) of transcription factor motifs enriched in the regulatory regions of the 86 mesenchymal-associated genes.



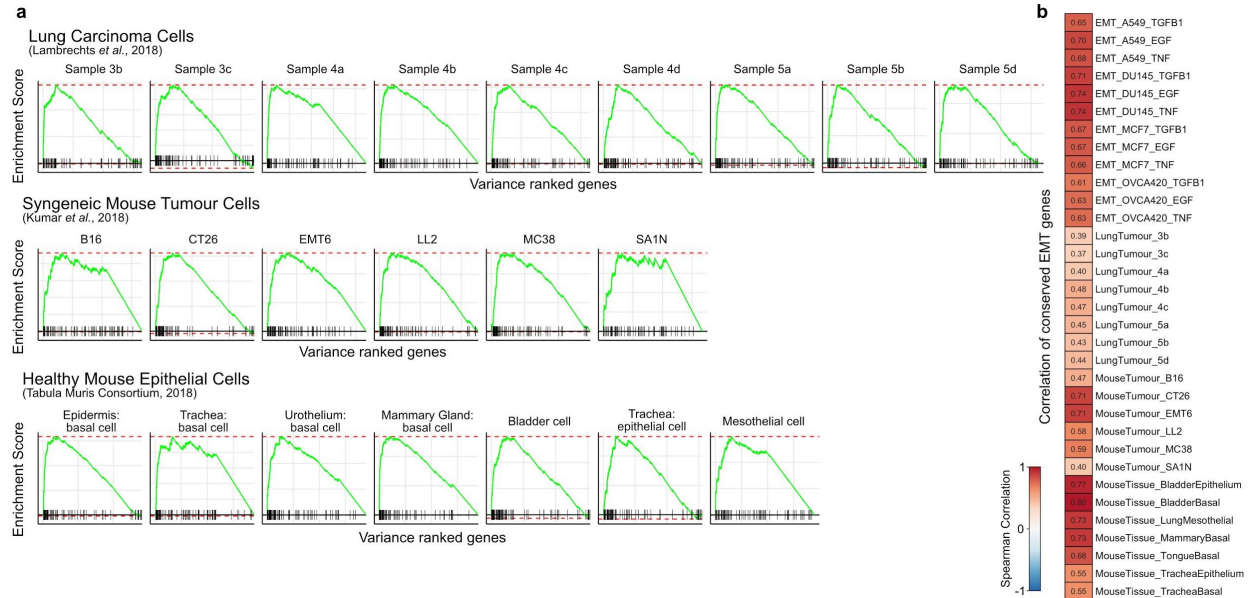

**Supplementary Figure 8. Conserved EMT-associated genes contribute to a coordinate heterogeneity program in epithelial tissues and tumours. a**, GSEA plots of conserved EMT genes in the most variable genes from a variety of epithelial and carcinoma populations. The conserved EMT gene set corresponds to the 86 genes that are upregulated in at least 8 time course experiments. Human lung carcinoma scRNA-seq data was acquired from Lambrechts *et al.*<sup>57</sup>, syngeneic mouse tumour data was acquired from Kumar *et al.*<sup>58</sup>, and the healthy mouse epithelium data was acquired from the Tabula Muris Consortium<sup>59</sup>. **b**, The average correlation (Spearman) of the same conserved EMT genes and data sets as in (a).

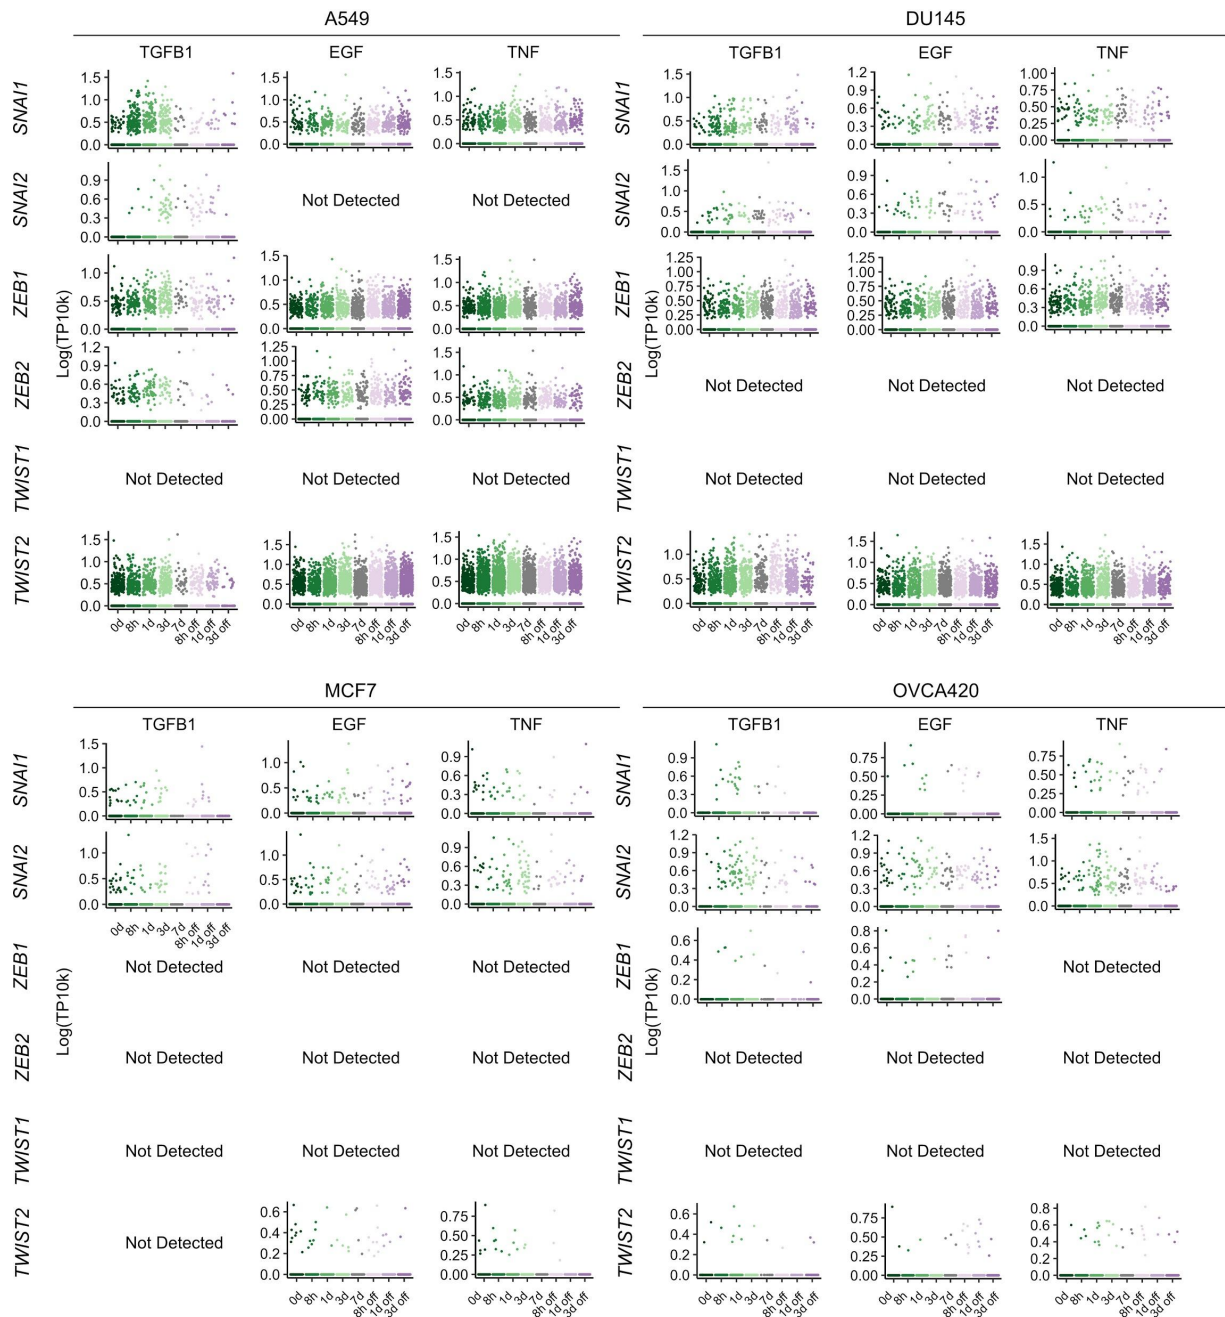

**Supplementary Figure 9. Expression of canonical EMT transcription factors throughout EMT responses.** Plots showing expression levels of *SNAI1*, *SNAI2*, *ZEB1*, *ZEB2*, *TWIST1*, and *TWIST2* in each time course experiment. Expression values are represented as log-transformed counts per 10k molecules (TP10k). Each dot corresponds to a single cell.

## A549 + TGFB1

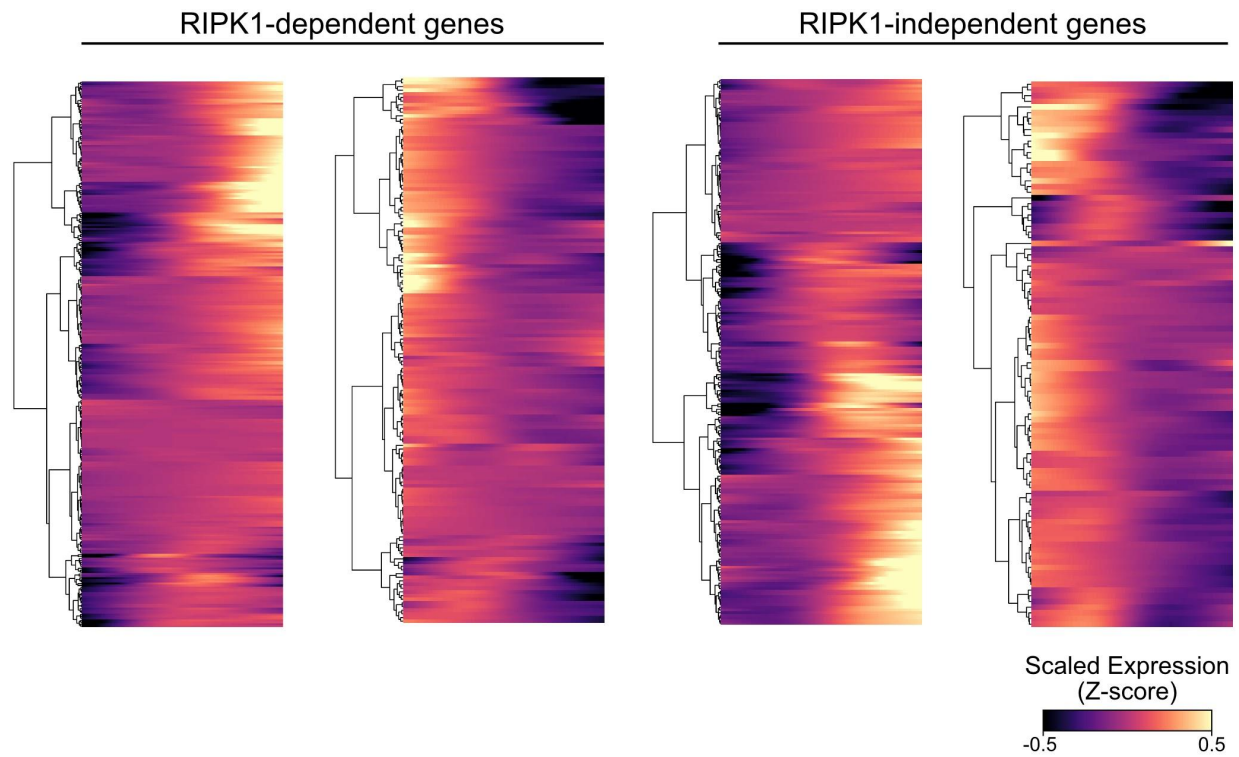

**Supplementary Figure 10. Expression dynamics of RIPK1-dependent and -independent genes.** Heatmaps of genes whose EMT-associated dynamics during TGFB1 treatment in A549 cells are blocked by RIPK1 inhibition (Nec-5 treatment; left), and those that are not affected by inhibition (right). The x-axis of the heatmaps correspond to EMT progression (pseudotime).
