# Supplementary material for: Context specificity of the EMT transcriptional response
Source: PubMed Central journal article supplement (PMC7195456; doi:10.1038/s41467-020-16066-2), 2020-05-01
Supplement: 41467_2020_16066_MOESM3_ESM.pdf [file 41467_2020_16066_MOESM3_ESM.pdf]

## **Description of Additional Supplementary Files**

File Name: Supplementary Data 1

Description: Tables of differentially expressed genes for each time course experiment.

File Name: Supplementary Data 2

Description: List of conserved EMT genes from time course experiments.
